# Supplementary material for: Automatic Detection and Quantification of Acute Cerebral Infarct by Fuzzy Clustering and Histographic Characterization on Diffusion Weighted MR Imaging and Apparent Diffusion Coefficient Map
Source: Hindawi journal article supplement (doi:10.1155/2014/963032), 2014-01-01
Supplement: f1 [file 963032.f1.pdf]

Supplementary: The statistics of the computer-assisted infarct segmentation results of individual patients after repeating the proposed method for 10 times

| Patient | Total infarct volume (ml) |               | SI (%)       | kappa (%)    | Sen. (%)      | Spe. (%)      | PPV (%)       | NPV (%)       |
|---------|---------------------------|---------------|--------------|--------------|---------------|---------------|---------------|---------------|
|         | Semi-auto                 | Auto          |              |              |               |               |               |               |
| 1       | 0.155                     | 0.212±0.014   | 84.661±3.301 | 84.661±3.301 | 100.000±0.000 | 99.999±0.000  | 73.529±4.937  | 100.000±0.000 |
| 2       | 0.358                     | 0.377±0.006   | 97.438±0.769 | 97.438±0.769 | 100.000±0.000 | 100.000±0.000 | 95.014±1.465  | 100.000±0.000 |
| 3       | 0.399                     | 0.381±0.009   | 97.716±1.124 | 97.716±1.124 | 95.556±2.160  | 100.000±0.000 | 100.000±0.000 | 100.000±0.000 |
| 4       | 0.474                     | 0.378±0.041   | 86.835±2.509 | 86.834±2.509 | 78.037±4.498  | 100.000±0.000 | 98.349±5.222  | 99.998±0.000  |
| 5       | 0.501                     | 0.337±0.026   | 91.662±1.726 | 91.662±1.726 | 93.398±1.384  | 100.000±0.000 | 91.723±3.838  | 100.000±0.000 |
| 6       | 0.545                     | 0.451±0.039   | 90.413±4.429 | 90.412±4.429 | 82.764±7.188  | 100.000±0.000 | 100.000±0.000 | 99.999±0.001  |
| 7       | 0.612                     | 0.471±0.017   | 82.684±1.146 | 82.683±1.146 | 73.190±0.273  | 100.000±0.000 | 95.072±3.243  | 99.998±0.000  |
| 8       | 0.644                     | 0.479±0.013   | 85.332±1.298 | 85.331±1.298 | 74.436±1.973  | 100.000±0.000 | 100.000±0.000 | 99.998±0.000  |
| 9       | 0.796                     | 0.895±0.010   | 94.143±0.551 | 94.142±0.551 | 100.000±0.000 | 99.999±0.000  | 88.938±0.984  | 100.000±0.000 |
| 10      | 1.003                     | 1.019±0.019   | 98.927±0.667 | 98.927±0.667 | 99.710±0.407  | 100.000±0.000 | 98.171±1.527  | 100.000±0.000 |
| 11      | 1.675                     | 1.794±0.134   | 94.373±2.925 | 94.372±2.926 | 97.619±1.343  | 99.998±0.002  | 91.568±6.179  | 99.999±0.000  |
| 12      | 1.966                     | 1.497±0.043   | 86.438±1.407 | 86.434±1.407 | 76.140±2.177  | 100.000±0.000 | 100.000±0.000 | 99.992±0.001  |
| 13      | 2.141                     | 3.232±0.114   | 79.722±1.703 | 79.715±1.704 | 100.000±0.000 | 99.984±0.002  | 66.312±2.366  | 100.000±0.000 |
| 14      | 3.749                     | 2.228±0.242   | 74.359±5.634 | 74.349±5.635 | 59.444±6.457  | 100.000±0.000 | 100.000±0.000 | 99.977±0.004  |
| 15      | 4.143                     | 3.448±0.673   | 85.827±4.120 | 85.819±4.122 | 78.898±10.536 | 99.997±0.004  | 95.789±5.858  | 99.987±0.007  |
| 16      | 10.108                    | 8.351±0.327   | 90.453±1.946 | 90.440±1.948 | 82.621±3.236  | 100.000±0.000 | 100.000±0.000 | 99.975±0.005  |
| 17      | 12.657                    | 10.088±0.546  | 88.603±2.612 | 88.582±2.616 | 79.662±4.245  | 100.000±0.000 | 99.952±0.115  | 99.958±0.009  |
| 18      | 13.063                    | 13.492±0.246  | 97.656±0.899 | 97.652±0.901 | 99.254±0.000  | 99.992±0.004  | 96.124±1.730  | 99.999±0.000  |
| 19      | 15.014                    | 11.611±0.483  | 87.181±2.023 | 87.159±2.026 | 77.332±3.207  | 100.000±0.000 | 99.992±0.017  | 99.955±0.006  |
| 20      | 46.828                    | 54.497±0.726  | 92.426±0.663 | 92.374±0.668 | 99.990±0.000  | 99.894±0.010  | 85.933±1.146  | 100.000±0.000 |
| 21      | 56.517                    | 59.147±0.647  | 97.526±0.516 | 97.503±0.521 | 99.793±0.000  | 99.956±0.010  | 95.365±0.985  | 99.998±0.000  |
| 22      | 482.939                   | 429.534±0.915 | 94.147±0.106 | 93.675±0.114 | 88.942±0.189  | 100.000±0.000 | 100.000±0.000 | 99.056±0.016  |

Note: SI = similarity index; Sen. = sensitivity; Spe. = specificity; PPV = positive predictive value;

NPV = negative predictive value.
